# Supplementary material for: Air pollution in the week prior to delivery and preterm birth in 24 Canadian cities: a time to event analysis
Source: PubMed Central journal article supplement (PMC6318965; doi:10.1186/s12940-018-0440-8), 2019-01-03

Figure S1. Hazard Ratio by City per 13.3 ppb O<sub>3</sub> lag 0 days

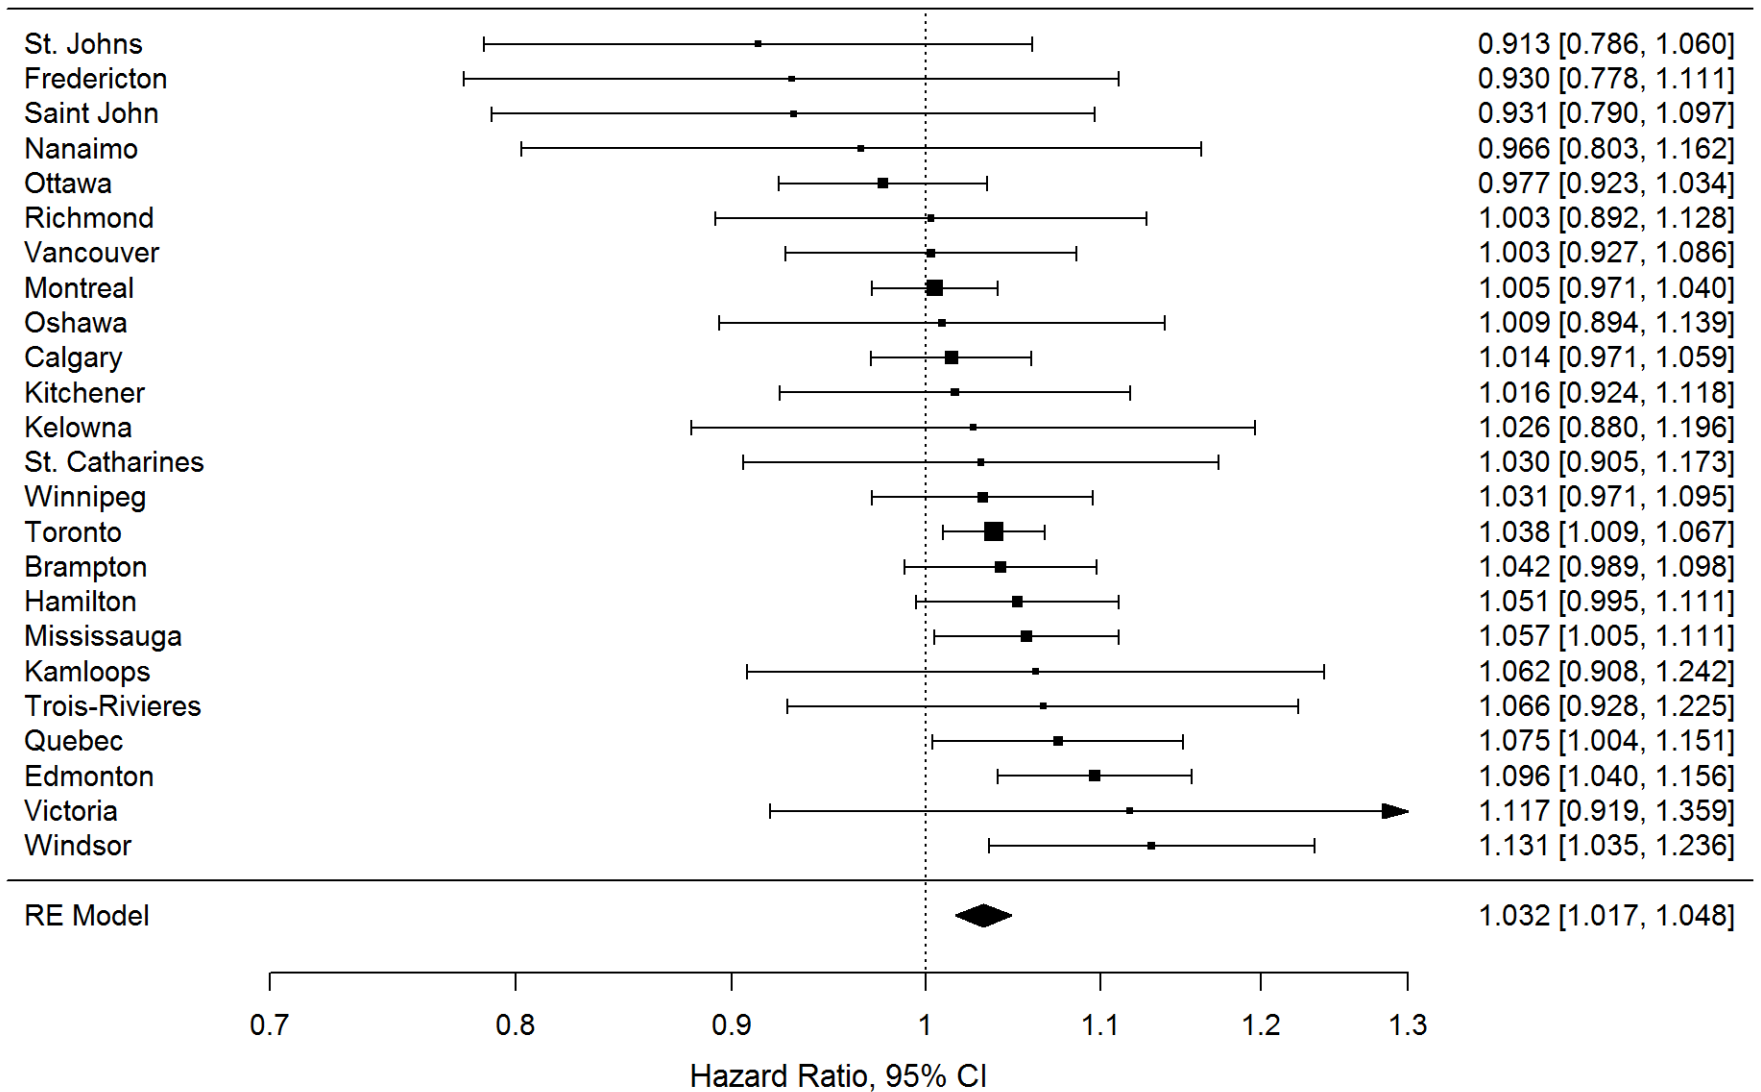

Figure S2. Pooled Hazard Ratio by Lag per 0.36 ppm CO

Lag day

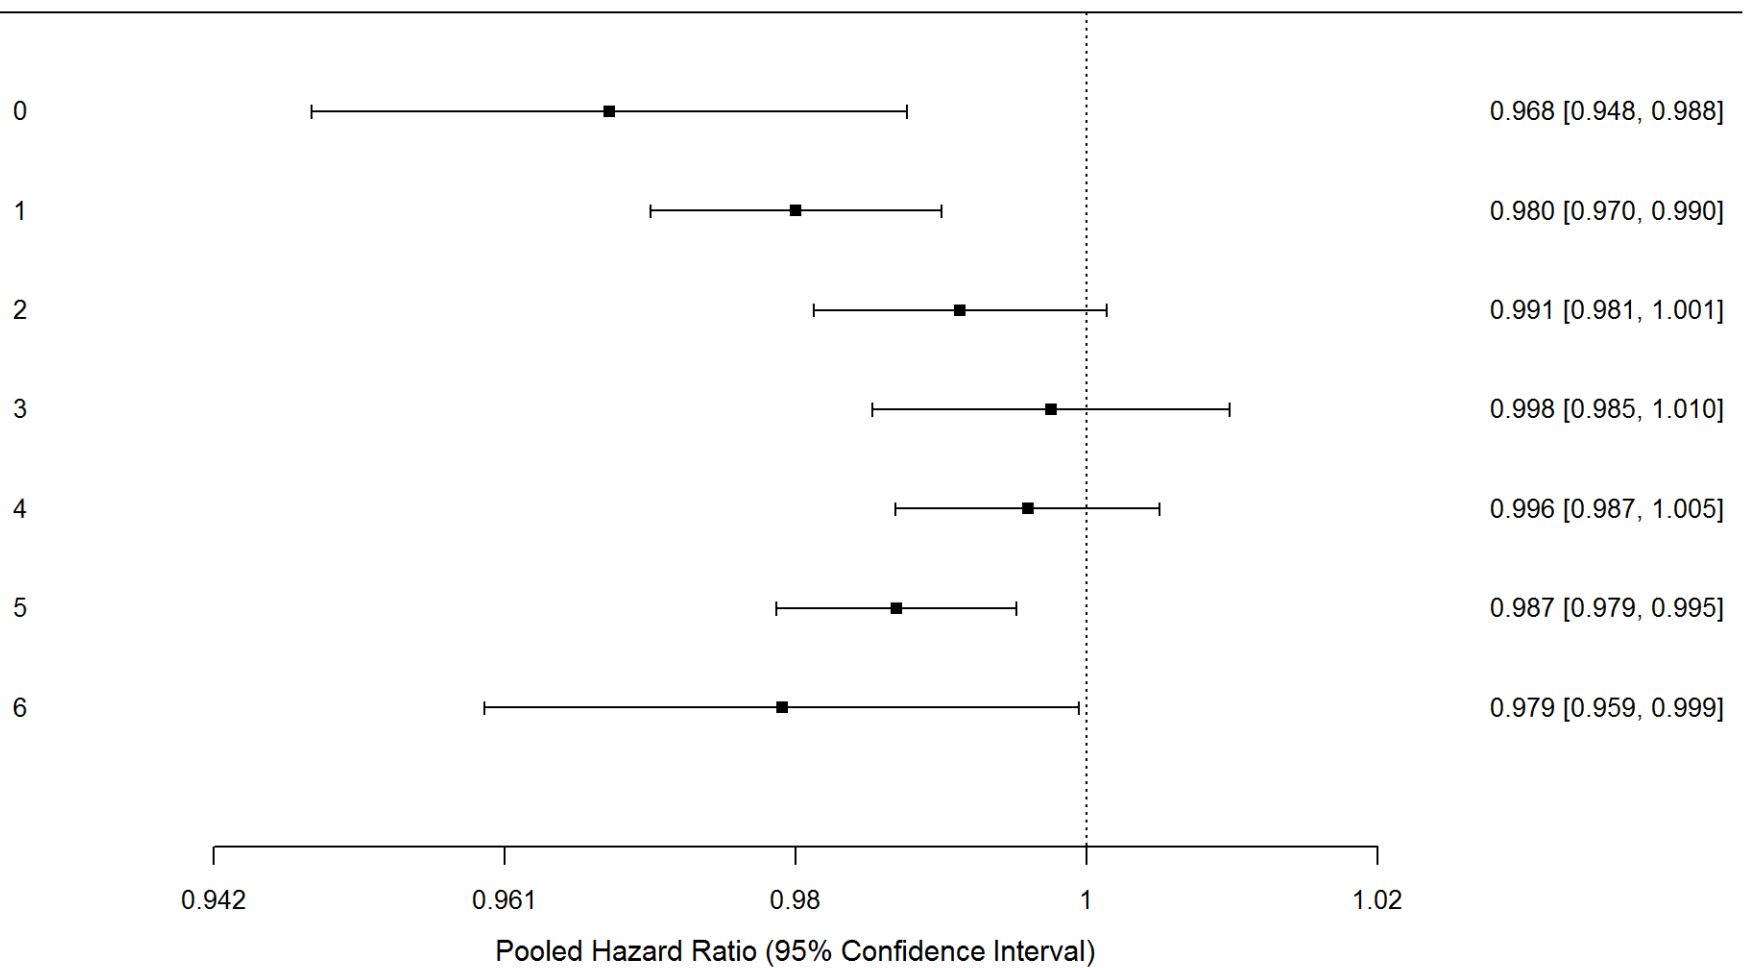

Figure S3. Pooled Hazard Ratio by Lag per 10.3 ppb NO<sub>2</sub>

Lag day

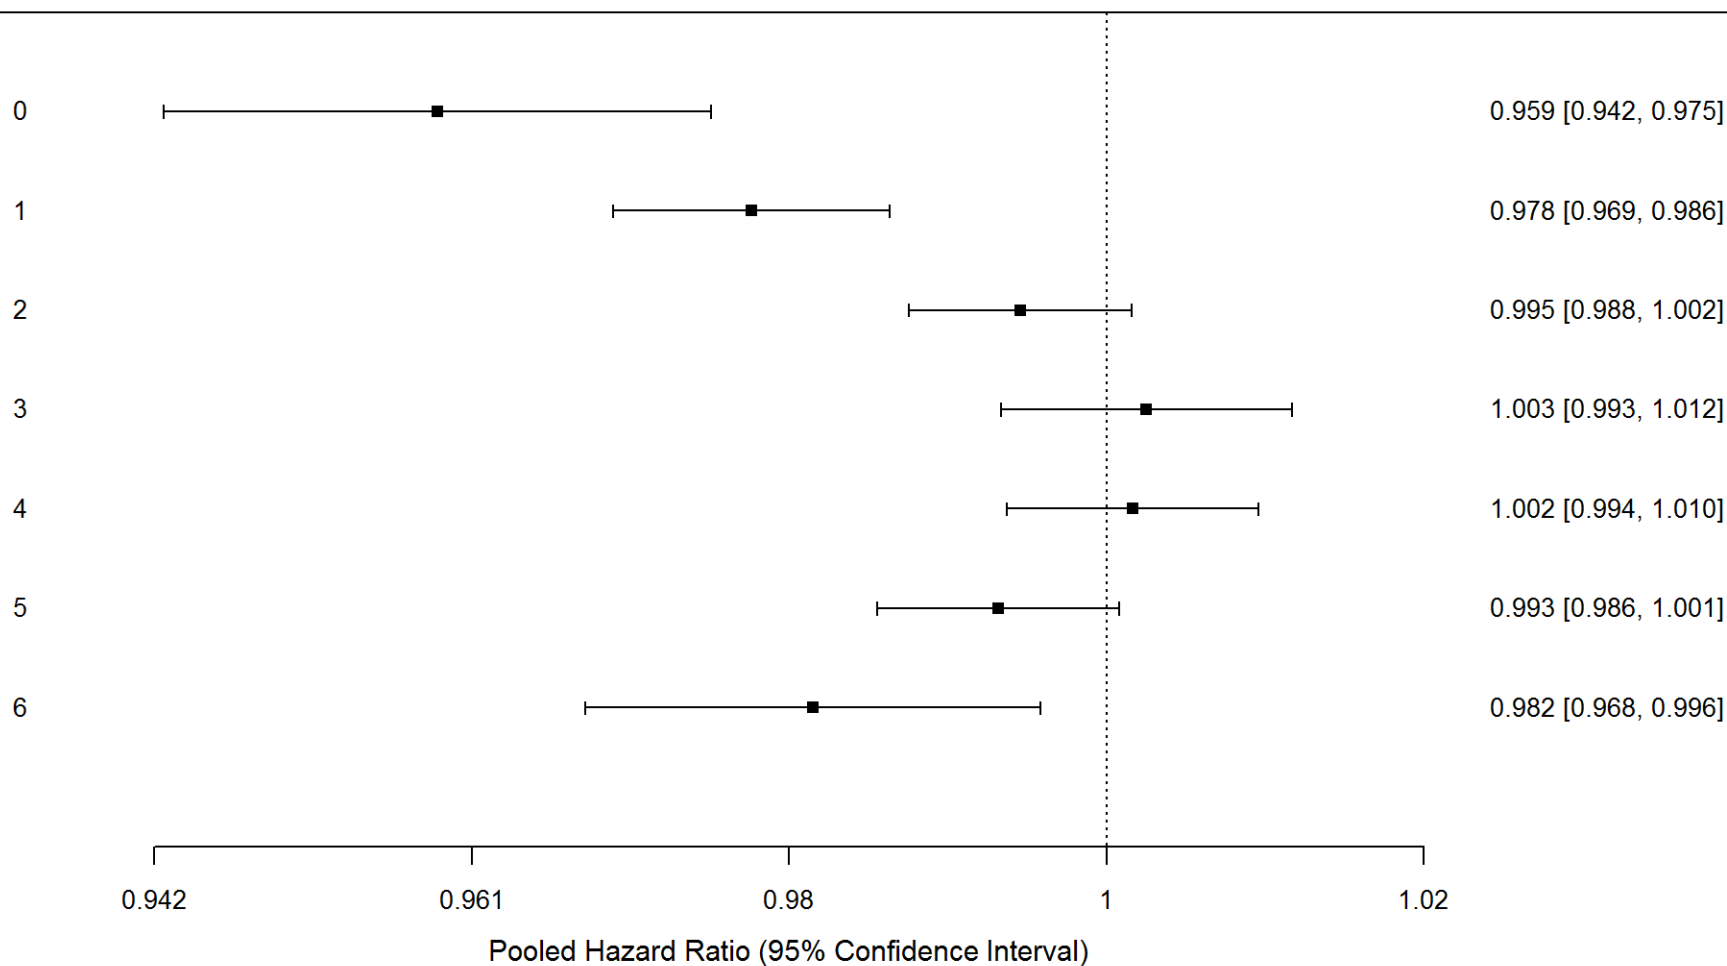

Figure S4. Pooled Hazard Ratio by Lag per 7.4  $\mu\text{g}/\text{m}^3$   $\text{PM}_{2.5}$

Lag day

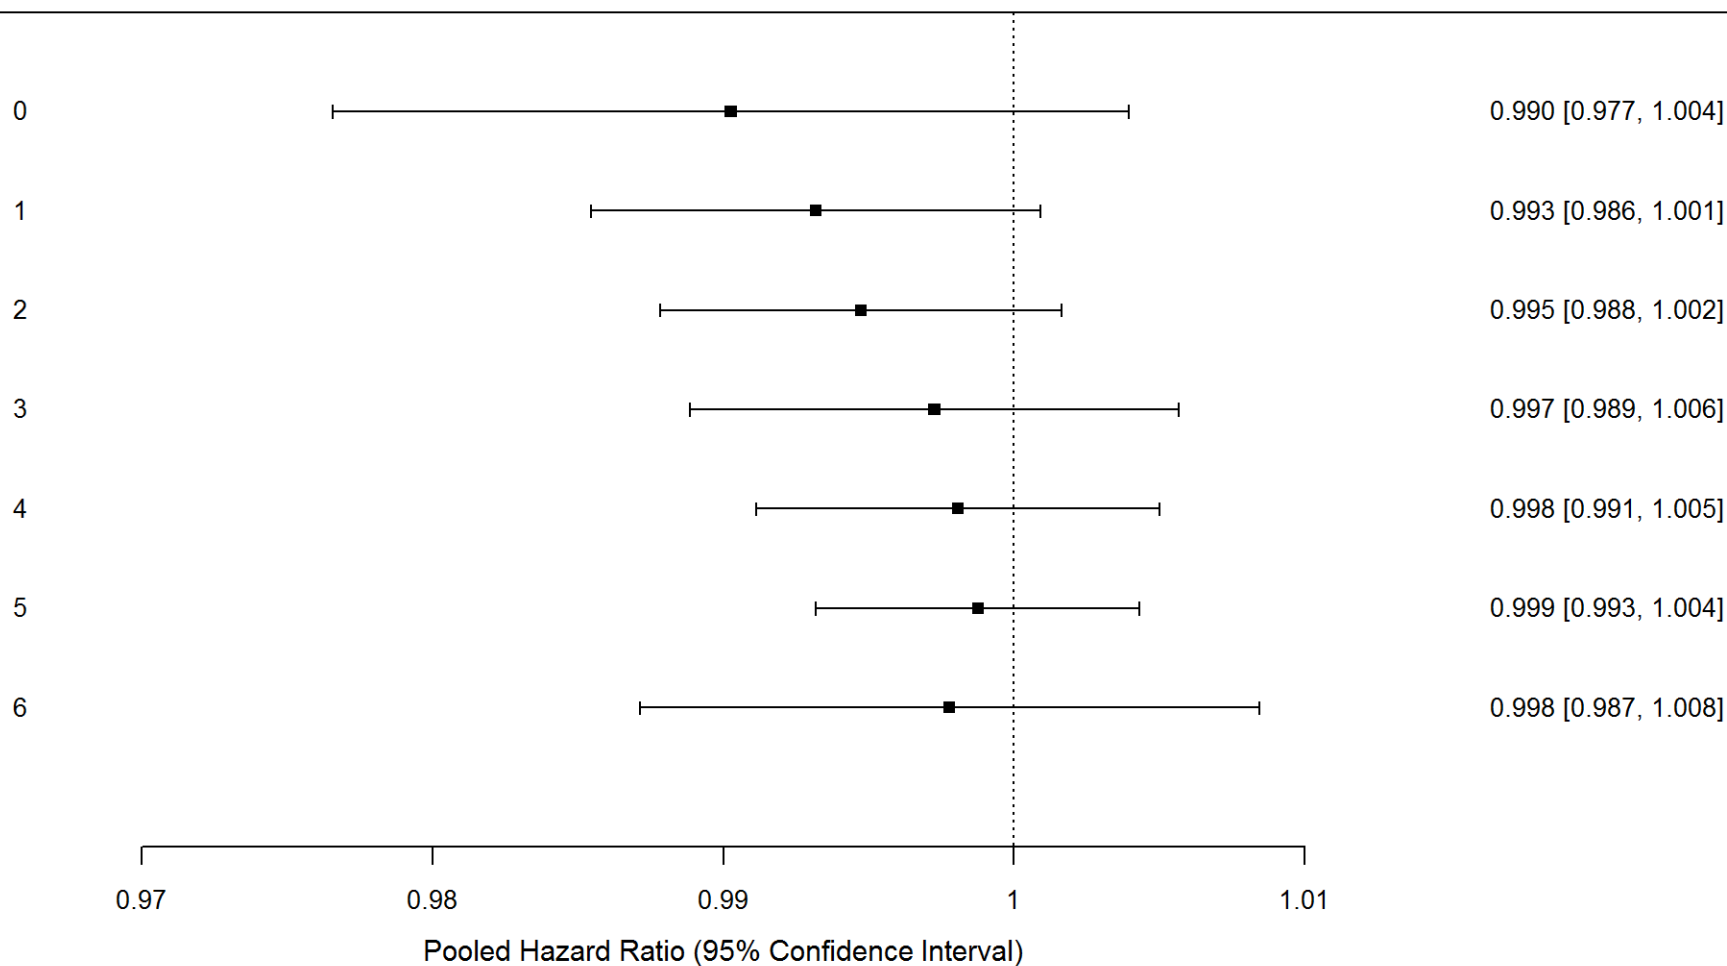

Figure S5. Pooled Hazard Ratio by Lag per 2.9 ppb SO<sub>2</sub>

Lag day

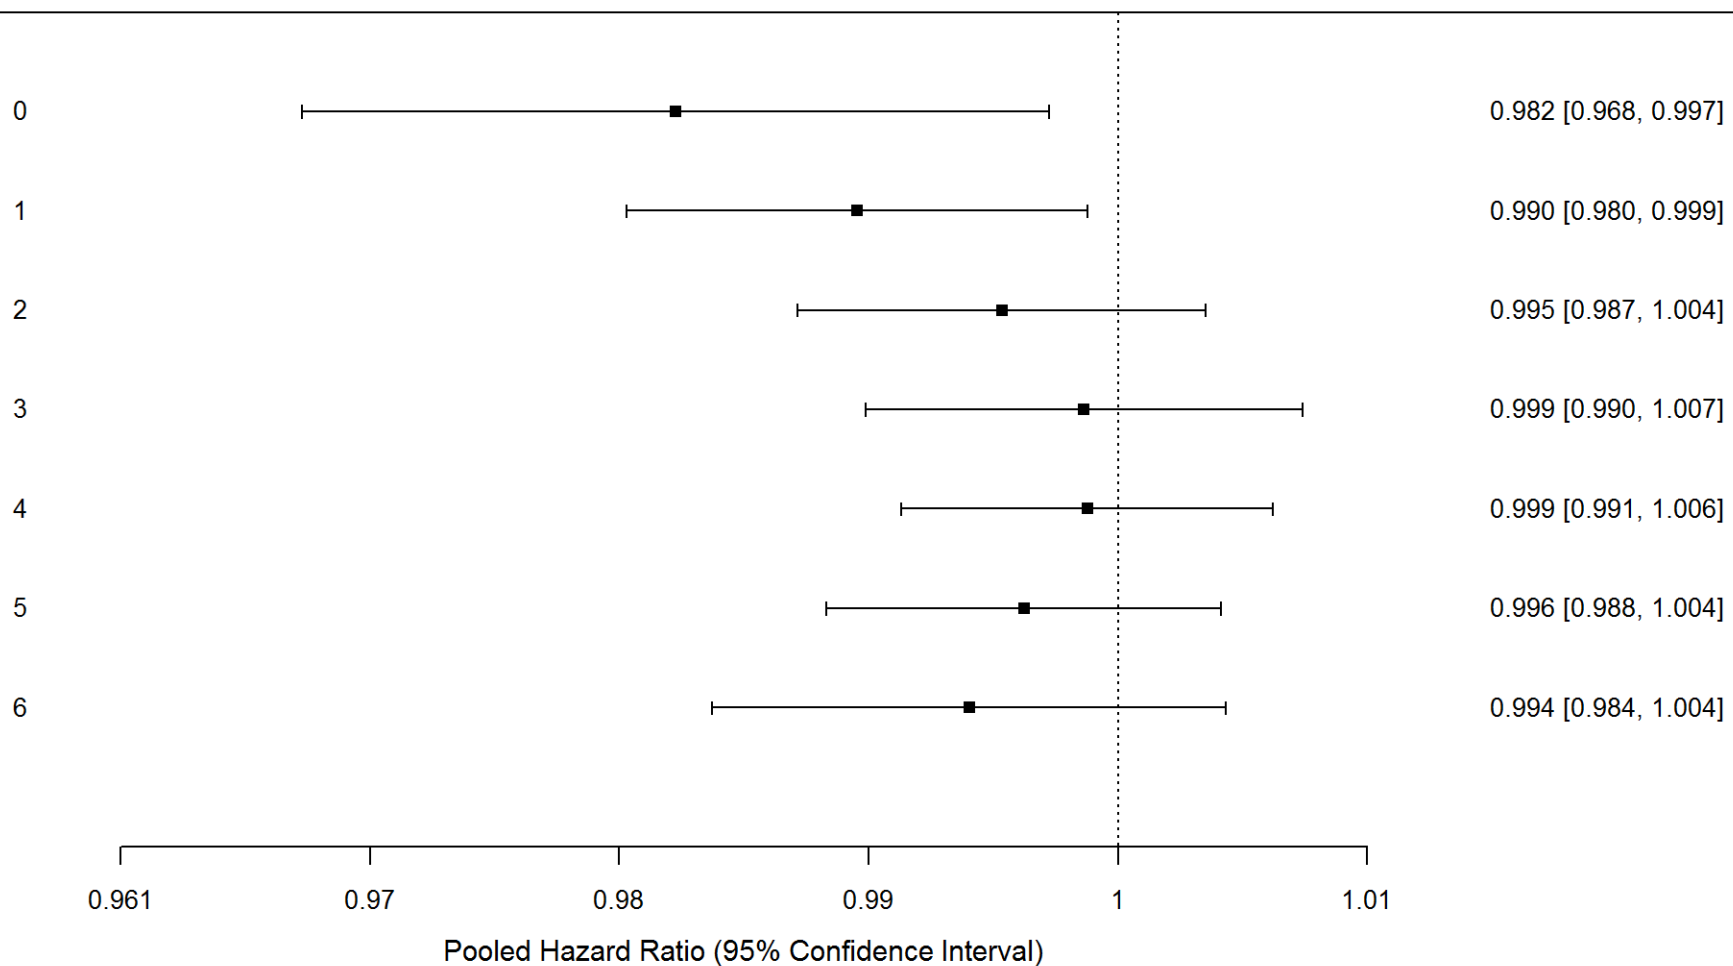

Supplement: 12940_2018_440_MOESM1_ESM.pdf [file 12940_2018_440_MOESM1_ESM.pdf]
